# Supplementary material
Source: PubMed Central journal article supplement (PMC10992303)
Supplement: 262_2021_2921_MOESM1_ESM.pdf [file 262_2021_2921_MOESM1_ESM.pdf]

# Supplemental Figure 1

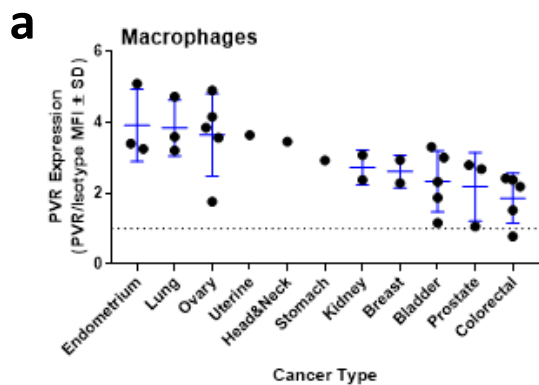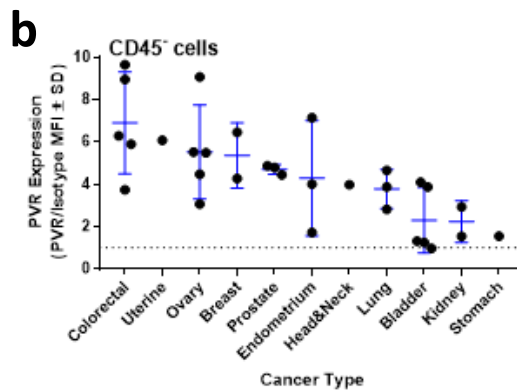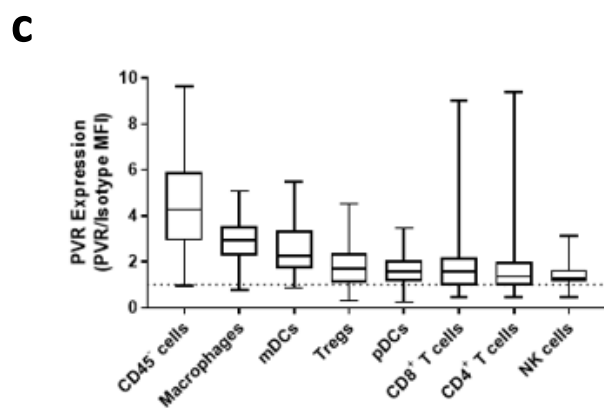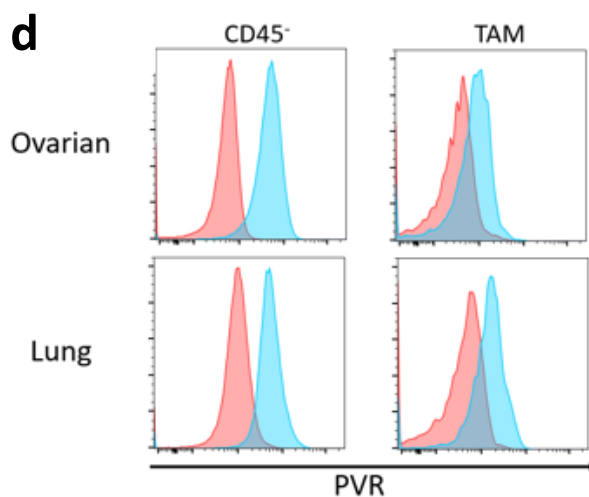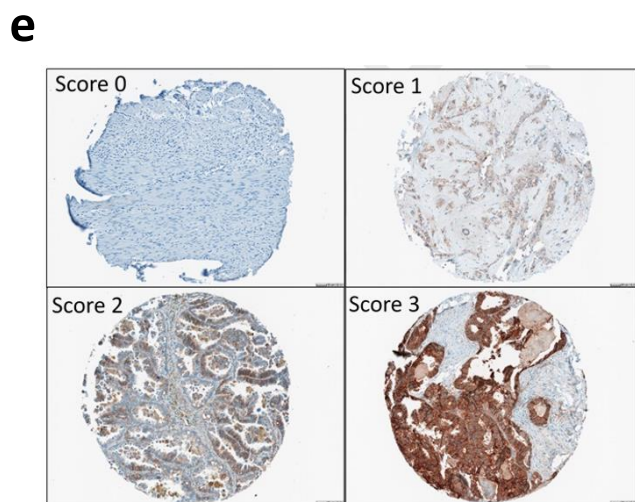

**f**

|                |                                                                                                                 |
|----------------|-----------------------------------------------------------------------------------------------------------------|
| <b>Score 3</b> | Complete, intense, membranous staining in >50% of cells                                                         |
| <b>Score 2</b> | Complete, intense, membranous staining in <50% of cells OR Complete, weak, membranous staining in >50% of cells |
| <b>Score 1</b> | Complete, weak, membranous staining in <50% of cells OR Incomplete membranous staining in any cells             |
| <b>Score 0</b> | No membranous staining                                                                                          |

# Supplemental Figure 1g: PVR expression in healthy and tumor tissues

## PVR- tumor

| Tissue Type   | Total Samples | % Low (Score 1) | % Moderate (Score 2) | % High (Score 3) |
|---------------|---------------|-----------------|----------------------|------------------|
| Colon         | 20            | 0               | 5                    | 95               |
| Prostate      | 21            | 0               | 14                   | 86               |
| Liver         | 10            | 0               | 10                   | 90               |
| Skin          | 8             | 13              | 25                   | 63               |
| Stomach       | 9             | 33              | 11                   | 56               |
| Brain         | 10            | 30              | 10                   | 60               |
| Head and Neck | 24            | 33              | 21                   | 46               |
| Bladder       | 11            | 18              | 27                   | 55               |
| Endometrial   | 14            | 0               | 50                   | 50               |
| Lung          | 19            | 37              | 26                   | 37               |
| Pancreatic    | 11            | 27              | 36                   | 36               |
| Thyroid       | 10            | 60              | 20                   | 20               |
| Ovarian       | 10            | 20              | 50                   | 30               |
| Kidney        | 25            | 32              | 40                   | 28               |
| Breast        | 19            | 84              | 11                   | 5                |

## PVR- healthy

| Tissue Type   | Total Samples | % Low (Score 1) | % Moderate (Score 2) | % High (Score 3) |
|---------------|---------------|-----------------|----------------------|------------------|
| Colon         | 1             | 0               | 0                    | 100              |
| Prostate      | 3             | 0               | 0                    | 100              |
| Liver         | 2             | 0               | 0                    | 100              |
| Skin          | 1             | 100             | 0                    | 0                |
| Stomach       | 3             | 0               | 0                    | 100              |
| Brain         | 4             | 0               | 0                    | 0                |
| Head and Neck | 2             | 0               | 0                    | 100              |
| Bladder       | 3             | 0               | 0                    | 100              |
| Endometrium   | 1             | 0               | 100                  | 0                |
| Lung          | 2             | 0               | 100                  | 0                |
| Pancreatic    | 3             | 0               | 0                    | 100              |
| Thyroid       | 3             | 0               | 100                  | 0                |
| Ovarian       | 3             | 33              | 67                   | 0                |
| Kidney        | 4             | 0               | 0                    | 100              |
| Breast        | 1             | 100             | 0                    | 0                |
