# Supplementary material
Source: PubMed Central journal article supplement (PMC10992303)

# Supplemental Figure 2

**a**

| Cell Type                                    | $K_D \pm 95\% \text{ CI (nM)}$ | $IC_{50} \pm 95\% \text{ CI (nM)}$ |
|----------------------------------------------|--------------------------------|------------------------------------|
| Human TIGIT OE cells                         | $0.30 \pm 0.11$                |                                    |
| Cyno TIGIT OE cells                          | $0.35 \pm 0.02$                |                                    |
| Mouse TIGIT OE cells                         | $9.29 \pm 4.42$                |                                    |
| Human CD8 <sup>+</sup> T <sub>EM</sub> cells | $0.11 \pm 0.06$                |                                    |
| Cyno CD8 <sup>+</sup> T <sub>EM</sub> cells  | $0.29 \pm 0.07$                |                                    |
| Human TIGIT OE cells + hPVR-mFc              |                                | $0.18 \pm 0.02$                    |
| Cyno TIGIT OE cells + cPVR-hFc               |                                | $0.55 \pm 0.06$                    |
| Mouse TIGIT OE cells + mPVR-hFc*             |                                | $0.16 \pm 0.03$                    |

**b**

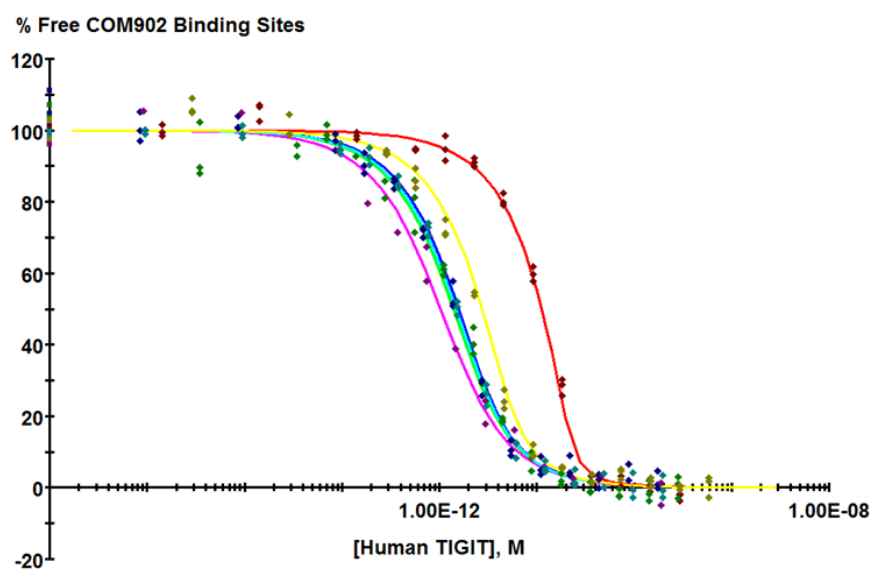

**c**

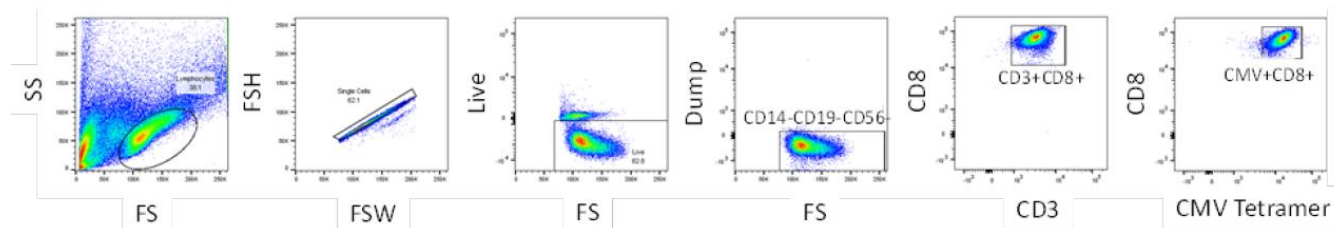

Supplement: 262_2021_2921_MOESM2_ESM.pdf [file 262_2021_2921_MOESM2_ESM.pdf]
