# Supplementary material
Source: PubMed Central journal article supplement (PMC10992303)

# Supplemental Figure 3

**a**

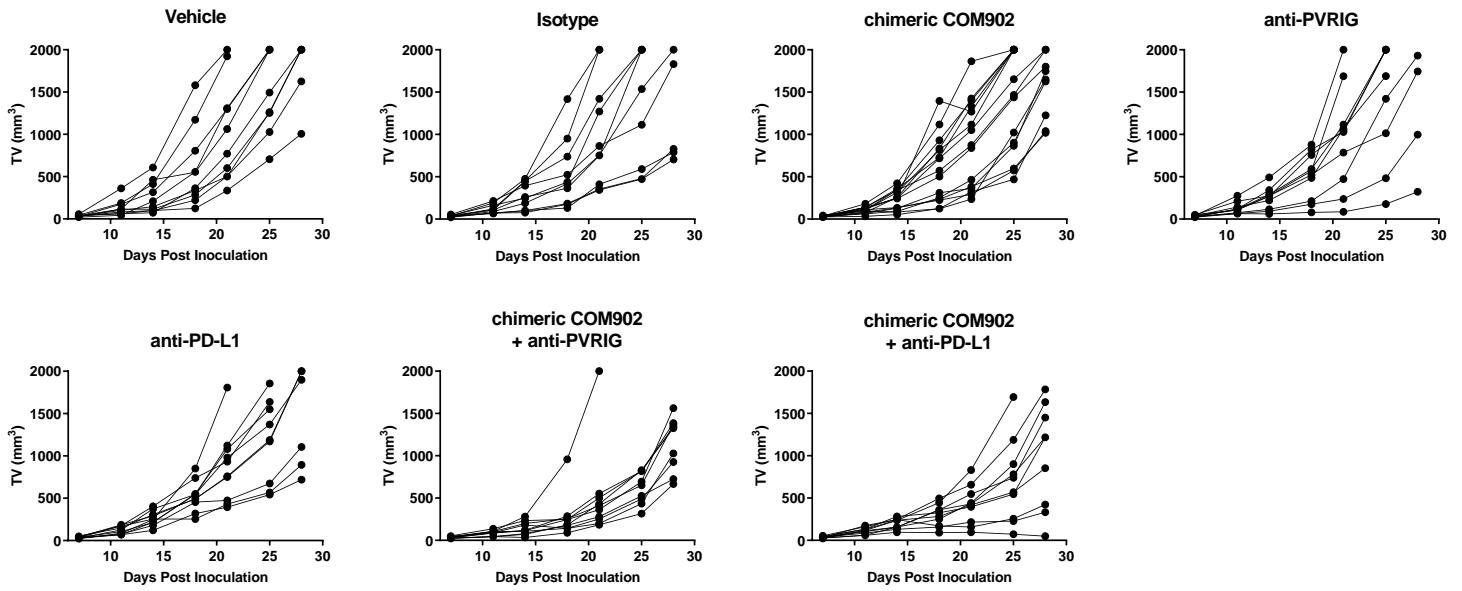

**b**

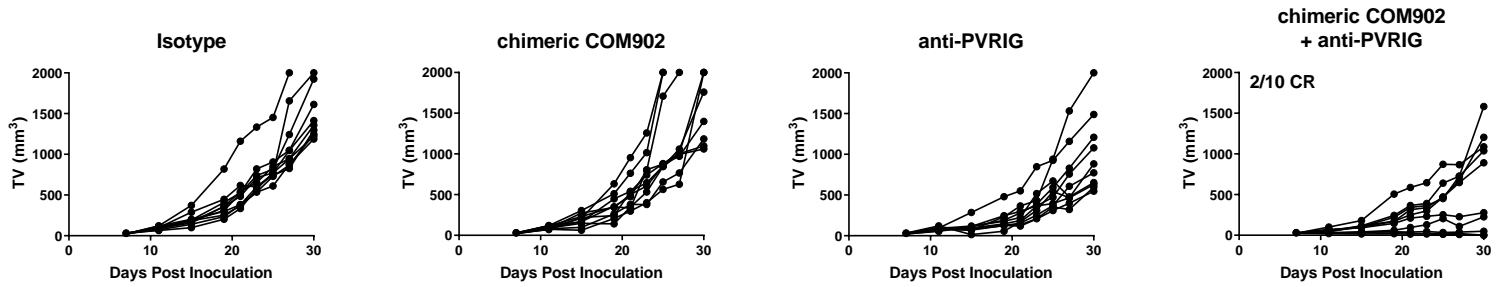

**c**

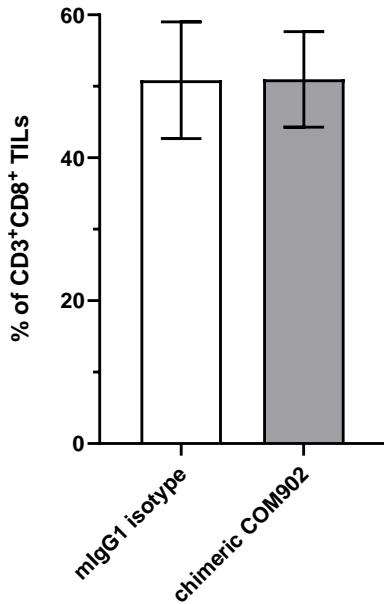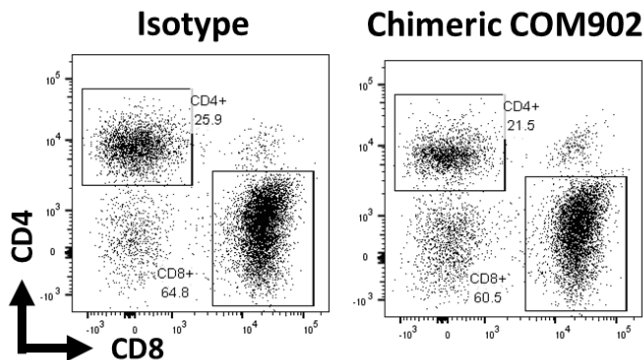

Supplement: 262_2021_2921_MOESM3_ESM.pdf [file 262_2021_2921_MOESM3_ESM.pdf]
